# Supplementary material for: Novel synthesis of porous Mg scaffold as a reactive containment vessel for LiBH4
Source: Royal Society of Chemistry journal article supplement (doi:10.1039/c7ra05275h), 2017-01-01

### Supplementary Information:

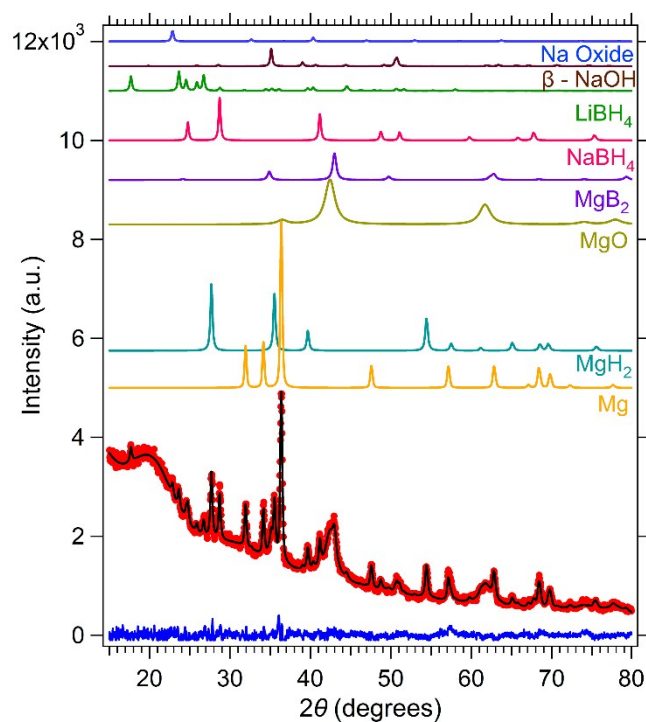

**Fig. s1.** Rietveld refinement plot of the crushed PMg33 sample. Experimental data shown with red circles, calculated diffraction pattern shown with black line and the difference plot shown in blue. The diffraction patterns of Mg, MgH<sub>2</sub>, MgO, MgB<sub>2</sub>, NaBH<sub>4</sub>, LiBH<sub>4</sub>, β-NaOH and Na oxide are represented with orange, teal, purple, pink, green, brown and blue colours respectively.

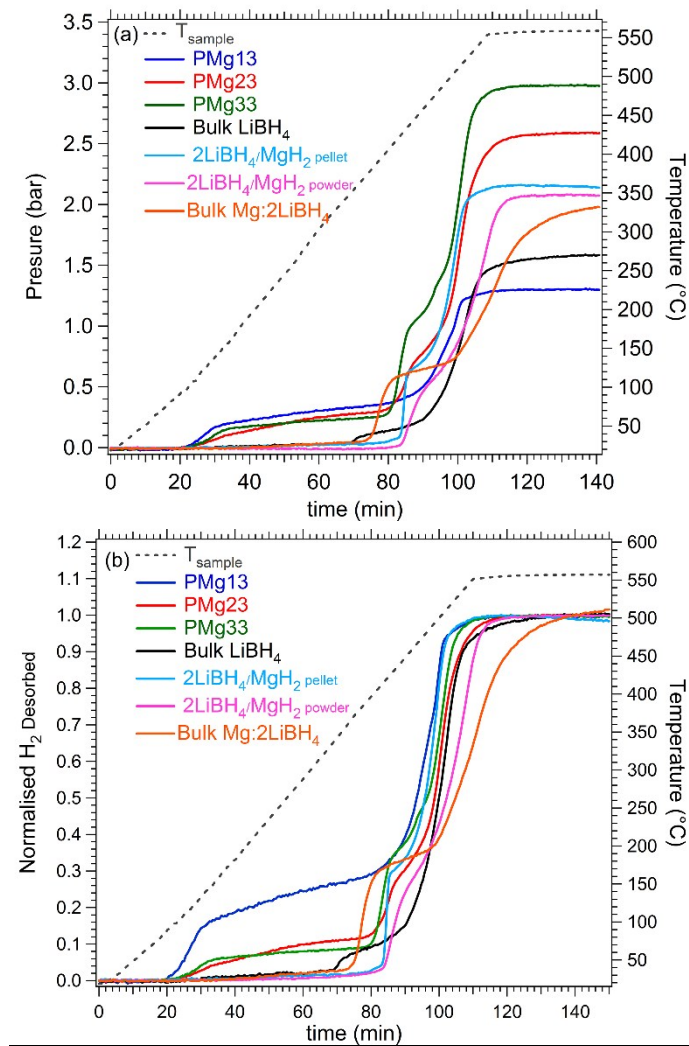

**Fig. s2.** Temperature programmed desorption results for PMg13, PMg23, PMg33, Bulk LiBH<sub>4</sub>, bulk 2LiBH<sub>4</sub>/MgH<sub>2</sub> in a pellet form, bulk 2LiBH<sub>4</sub>/MgH<sub>2</sub> in a powder form and as prepared porous Mg pellet crushed and mixed with LiBH<sub>4</sub> with a 2LiBH<sub>4</sub>/Mg molar ratio (a) desorbed hydrogen pressure versus time (b) normalised wt% of hydrogen desorbed versus time.

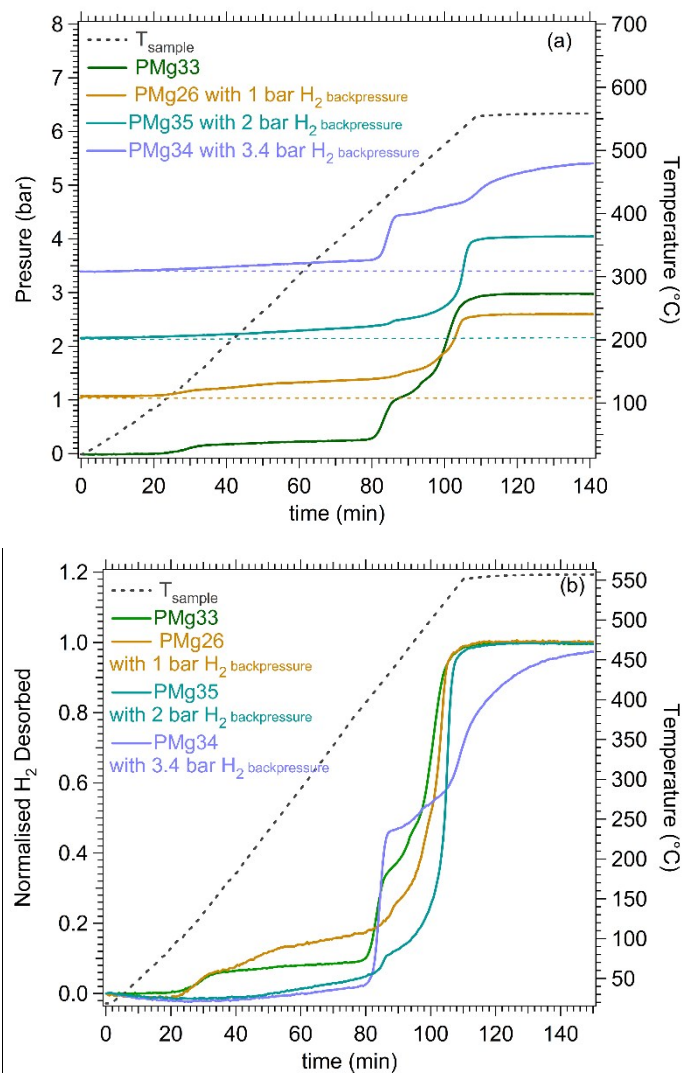

**Fig. s3.** Temperature programmed desorption results for PMg33, PMg26, PMg35 and PMg34 (a) desorbed hydrogen pressure versus time (b) normalised wt% of hydrogen desorbed versus temperature conducted under 0, 1, 2 and 3.4 bar of H<sub>2</sub> backpressure.

**Table s1.** Experimental (TPD) and theoretical quantity of desorbed H<sub>2</sub> from infiltrated

| Quantity of infiltrated LiBH <sub>4</sub> (wt%)              | Max T <sub>desorption</sub> (°C) | Max P <sub>observed</sub> (bar)                | Exp. H <sub>2</sub> wt% | Theor. H <sub>2</sub> wt% from eq (2) | Theor. H <sub>2</sub> wt% from eq (2&8) | Theor. H <sub>2</sub> wt% from eq (3) | Theor. H <sub>2</sub> wt% from eq (3&8) | Theor. H <sub>2</sub> wt% from eq (1) |
|--------------------------------------------------------------|----------------------------------|------------------------------------------------|-------------------------|---------------------------------------|-----------------------------------------|---------------------------------------|-----------------------------------------|---------------------------------------|
| 12.78                                                        | 543                              | 1.43                                           | 2.81                    | 2.37                                  | 2.96                                    | -                                     | -                                       | -                                     |
| 22.50                                                        | 558                              | 2.70                                           | 5.09                    | 4.16                                  | 5.21                                    | -                                     | -                                       | -                                     |
| 26.13                                                        | 556                              | 2.73<br>(1 bar H <sub>2</sub> back pressure)   | 4.20                    | 4.84                                  | 6.05                                    | -                                     | -                                       | -                                     |
| 32.55                                                        | 559                              | 3.09                                           | 7.12                    | 6.02                                  | 7.53                                    | -                                     | -                                       | -                                     |
| 33.95                                                        | 555                              | 5.49<br>(3.4 bar H <sub>2</sub> back pressure) | 3.10                    | 6.28                                  | 7.85                                    | -                                     | -                                       | -                                     |
| 35.05                                                        | 559                              | 4.05<br>(2 bar H <sub>2</sub> back pressure)   | 4.65                    | 6.49                                  | 8.11                                    | -                                     | -                                       | -                                     |
| 2LiBH <sub>4</sub> :MgH <sub>2</sub> molar ratio pellet form | 557                              | 2.16                                           | 9.74                    | 11.43                                 | 14.28                                   | -                                     | -                                       | -                                     |
| 2LiBH <sub>4</sub> :MgH <sub>2</sub> molar ratio powder form | 558                              | 2.08                                           | 9.69                    | 11.43                                 | 14.28                                   | -                                     | -                                       | -                                     |
| 2LiBH <sub>4</sub> :Mg molar ratio (bulk)                    | 558                              | 2.04                                           | 4.81                    | -                                     | -                                       | 8.57                                  | 11.69                                   | -                                     |
| 100 (bulk)                                                   | 557                              | 1.73                                           | 12.11                   | -                                     | -                                       | -                                     | -                                       | 13.8                                  |

LiBH<sub>4</sub>.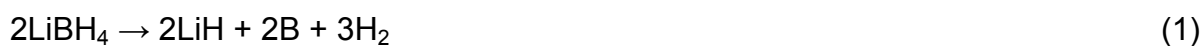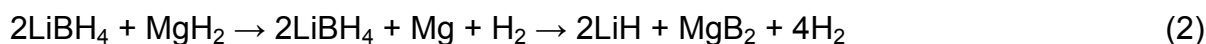

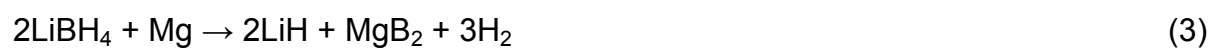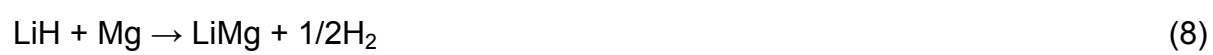

Supplement: c7ra05275h1.pdf [file c7ra05275h1.pdf]
